# Supplementary material for: Service Use and Barriers to Mental Health Care Among Adults With Major Depression and Comorbid Substance Dependence
Source: Atypon-hosted journal article supplement (doi:10.1176/appi.ps.201200289), 2013-06-03
Supplement: 863_ds001.pdf [file 863_ds001.pdf]

**Online Appendix Table A:** Reasons for not receiving mental health treatment among 18,972 NSDUH 2005-2010 adult participants who perceived an unmet need for mental health care.

Which of these statements explains why you did not get the mental health treatment or counseling you needed?

- You couldn't afford the cost.<sup>a</sup>
- You were concerned that getting mental health treatment or counseling might cause your neighbors or community to have a negative opinion of you.<sup>b</sup>
- You were concerned that getting mental health treatment or counseling might have a negative effect on your job.<sup>b</sup>
- Your health insurance does not cover any mental health treatment or counseling.<sup>a</sup>
- Your health insurance does not pay enough for mental health treatment or counseling.<sup>a</sup>
- You did not know where to go to get services.<sup>d</sup>
- You were concerned that the information you gave the counselor might not be kept confidential.<sup>b</sup>
- You were concerned that you might be committed to a psychiatric hospital or might have to take medicine.<sup>c</sup>
- You didn't think you needed treatment at the time.<sup>c</sup>
- You thought you could handle the problem without treatment.<sup>c</sup>
- You didn't think treatment would help.<sup>c</sup>
- You didn't have time (because of job, childcare, or other commitments).<sup>d</sup>
- You didn't want others to find out that you needed treatment.<sup>b</sup>
- You had no transportation, or treatment was too far away, or the hours were not convenient.<sup>d</sup>
- Some other reason or reasons.

<sup>a</sup> financial reasons; <sup>b</sup> stigma reasons; <sup>c</sup> attitudinal reasons; <sup>d</sup> structural reasons.

**Online Appendix Table B:** Mental health service use patterns and perceived unmet need of 18,972 NSDUH 2005-2010 adult participants with past-year major depressive episodes with and without comorbid alcohol dependence disorder, drug dependence disorder or both alcohol and drug dependence disorders.

|                                                                                         | Major depressive episodes without substance dependence comorbidity |                        | Major depressive episodes with alcohol dependence comorbidity |                        | Major depressive episodes with non-alcohol drug dependence comorbidity |            |
|-----------------------------------------------------------------------------------------|--------------------------------------------------------------------|------------------------|---------------------------------------------------------------|------------------------|------------------------------------------------------------------------|------------|
|                                                                                         | aRR                                                                | 95% CI                 | aRR                                                           | 95% CI                 | aRR                                                                    | 95% CI     |
| <b>Any mental health treatment</b>                                                      |                                                                    |                        |                                                               |                        |                                                                        |            |
| Major depressive episodes with alcohol dependence comorbidity                           | 1.32                                                               | 1.08-1.62 <sup>†</sup> |                                                               |                        |                                                                        |            |
| Major depressive episodes with non-alcohol drug dependence comorbidity                  | 1.54                                                               | 1.22-1.93 <sup>†</sup> | 1.16                                                          | .88-1.52               |                                                                        |            |
| Major depressive episodes with both alcohol and non-alcohol drug dependence comorbidity | 1.77                                                               | 1.29-2.43 <sup>†</sup> | 1.34                                                          | .96-1.88               | 1.15                                                                   | .78-1.71   |
| <b>Inpatient care</b>                                                                   |                                                                    |                        |                                                               |                        |                                                                        |            |
| Major depressive episodes with alcohol dependence comorbidity                           | 1.28                                                               | .88-1.85               |                                                               |                        |                                                                        |            |
| Major depressive episodes with non-alcohol drug dependence comorbidity                  | 1.91                                                               | 1.40-2.60 <sup>†</sup> | 1.49                                                          | .96-2.32               |                                                                        |            |
| Major depressive episodes with both                                                     | 2.96                                                               | 1.86-4.71 <sup>†</sup> | 2.31                                                          | 1.34-3.99 <sup>†</sup> | 1.55                                                                   | 1.00-2.39* |

| <b>alcohol and non-alcohol drug dependence comorbidity</b>                                     |      |                        |      |                        |      |          |
|------------------------------------------------------------------------------------------------|------|------------------------|------|------------------------|------|----------|
| <b>Outpatient care</b>                                                                         |      |                        |      |                        |      |          |
| <b>Major depressive episodes with alcohol dependence comorbidity</b>                           | .95  | .79-1.14               |      |                        |      |          |
| <b>Major depressive episodes with non-alcohol drug dependence comorbidity</b>                  | 1.20 | .93-1.54               | 1.26 | .97-1.64               |      |          |
| <b>Major depressive episodes with both alcohol and non-alcohol drug dependence comorbidity</b> | 1.46 | 1.10-1.93 <sup>†</sup> | 1.53 | 1.15-2.05 <sup>†</sup> | 1.22 | .87-1.69 |
| <b>Medication treatment</b>                                                                    |      |                        |      |                        |      |          |
| <b>Major depressive episodes with alcohol dependence comorbidity</b>                           | 1.31 | 1.06-1.61 <sup>*</sup> |      |                        |      |          |
| <b>Major depressive episodes with non-alcohol drug dependence comorbidity</b>                  | 1.70 | 1.38-2.08 <sup>‡</sup> | 1.30 | 1.00-1.69              |      |          |
| <b>Major depressive episodes with both alcohol and non-alcohol drug dependence comorbidity</b> | 1.55 | 1.14-2.10 <sup>†</sup> | 1.18 | .87-1.61               | .91  | .64-1.30 |
| <b>Perceived unmet need</b>                                                                    |      |                        |      |                        |      |          |

|                                                                                                |      |                        |      |                        |      |          |
|------------------------------------------------------------------------------------------------|------|------------------------|------|------------------------|------|----------|
| <b>Major depressive episodes with alcohol dependence comorbidity</b>                           | 1.83 | 1.51-2.22 <sup>‡</sup> |      |                        |      |          |
| <b>Major depressive episodes with non-alcohol drug dependence comorbidity</b>                  | 2.31 | 1.88-2.85 <sup>‡</sup> | 1.26 | .98-1.62               |      |          |
| <b>Major depressive episodes with both alcohol and non-alcohol drug dependence comorbidity</b> | 2.71 | 2.04-3.60 <sup>‡</sup> | 1.48 | 1.09-2.07 <sup>*</sup> | 1.17 | .82-1.67 |

*Note:* aRR stands for adjusted risk ratio and CI for confidence interval. Adjusted risk ratios are from multivariate logistic models which controlled for age, sex, race, marital status, education, income, insurance, employment, functional impairment and population density.  
<sup>\*</sup>P<.05, <sup>†</sup>P<.01, <sup>‡</sup>P<.001
